# Supplementary material for: Denitrification and Nitrate-Dependent Fe(II) Oxidation in Various Pseudogulbenkiania Strains
Source: PubMed Central journal article supplement (PMC5017806; doi:10.1264/jsme2.me16001), 2016-07-15
Supplement: 31_293_s1.pdf [file 31_293_s1.pdf]

## Supplementary Information

### Denitrification and Nitrate-Dependent Fe(II)-Oxidation in Various Pseudogulbenkiania Strains

Satoshi Ishii, Kazuki Jokai, Shigeto Otsuka, Keishi Senoo, and Satoshi Okabe

Table S1. PCR primers used in this study.

| Target gene                                                            | Primer name      | Primer sequence (5'-->3') | Annealing temp. (°C) | Extension time (sec) | Reference                              |
|------------------------------------------------------------------------|------------------|---------------------------|----------------------|----------------------|----------------------------------------|
| 16S rRNA gene                                                          | m-27F            | AGRGTTCGATYMTGGCTCAG      | 55                   | 90                   | Tyson <i>et al.</i> 2004               |
|                                                                        | m-1492R          | GGYTACCTTGTTACGACTT       |                      |                      |                                        |
| <i>nirS</i>                                                            | m-cd3aF          | AACGYSAAGGARACSGG         | 58*                  | 60                   | Kandeler <i>et al.</i> 2006            |
|                                                                        | m-R3cd           | GASTTCGGRTGSGTCTTSAYGAA   |                      |                      |                                        |
| <i>nosZ</i> (NH8B type)                                                | nosZ-F-1181_NH8B | CGCTCTTCCTGGATAGCCAG      | 60                   | 60                   | This study                             |
|                                                                        | nosZ-R-1880_NH8B | ATGCAGGGCATGGCAGAA        |                      |                      |                                        |
|                                                                        | NH8B_3826510F    | TTCAATCCACAAGCCAAACAG     | 60                   | 30                   | This study                             |
|                                                                        | NH8B_3827082R    | TATTGCACCAACTTCTGCCA      |                      |                      |                                        |
| <i>nosZ</i> (2002 type)                                                | nosZ-F-1181_2002 | CGCTGTTCTCGACTCGCAG       | 60                   | 60                   | This study                             |
|                                                                        | nosZ-R-1880_2002 | AGRTGCAGSGCRTGGCAGAA      |                      |                      |                                        |
|                                                                        | 2002_323853F     | GCCAGTATTCGCCGTAGTC       | 60                   | 30                   | This study                             |
|                                                                        | 2002_323846R     | ATGTCCTACCAGAACTTCTTCC    |                      |                      |                                        |
| Intergenic region between <i>nosZ</i> and <i>nosZ</i> -like pseudogene | nosZ-R-1880_NH8B | ATGCAGGGCATGGCAGAA        | 56                   | 120                  | This study<br>Ishii <i>et al.</i> 2013 |
|                                                                        | IAC_92R          | GAGGCGATGTGGATGGTC        |                      |                      |                                        |
|                                                                        | NH8B_3828317F    | AATTCGCTACCGCAGAACAC      | 60                   | 30                   | This study                             |
|                                                                        | NH8B_3829464R    | GGTCATCTTGTTGCTGTCCA      |                      |                      |                                        |

\*Touchdown PCR from 63°C (-1°C/cycle)

Table S2. Sequencing primers used in this study.

| Target gene                                                            | Primer name   | Primer sequence (5'-->3') | Reference  |
|------------------------------------------------------------------------|---------------|---------------------------|------------|
| Intergenic region between <i>nosZ</i> and <i>nosZ</i> -like pseudogene | NH8B_3827573F | AGGAAGAATTTGCCATCCGGT     | This study |
|                                                                        | NH8B_3828165F | TTGATTGGAGCAGGTCAGCT      | This study |
|                                                                        | NH8B_3828945F | CCAAGTCAGGATTCAGAGATT     | This study |
|                                                                        | NH8B_3828925R | AATCTCTGAATCCTGACTTGG     | This study |

Table S3. The NDFO activity of the strains as examined by the high-throughput iron oxidation assay. Proportion of Fe(II) oxidized was calculated as a function of Fe(III) divided by the total amount of Fe in the medium after 1-week incubation. The GenBank accession numbers to the nucleotide sequences of the 16S rRNA gene, *nirS*, and *nosZ* are also shown.

| Strain ID | Proportion of Fe(II) oxidized (%) | GenBank Accession Number |             |             |
|-----------|-----------------------------------|--------------------------|-------------|-------------|
|           |                                   | 16S rRNA gene            | <i>nirS</i> | <i>nosZ</i> |
| KH1B      | 100.8                             | KU175358                 | KU175424    | KU175494    |
| KH2C      | 84.3                              | KU175359                 | KU175425    | KU175549    |
| KH3E      | 92.5                              | KU175360                 | KU175426    | KU175495    |
| KH4DB     | 99.8                              | KU175361                 | KU175427    | KU175496    |
| KH5A      | 66.4                              | KU175362                 | KU175428    | KU175497    |
| KH6C      | 90.8                              | KU175363                 | KU175429    | KU175498    |
| KH7B      | 92.8                              | KU175364                 | KU175430    | KU175550    |
| KH10D     | 100.7                             | KU175365                 | KU175431    | KU175551    |
| KH26C     | 66.8                              | KU175366                 | KU175432    | KU175499    |
| KH32A     | 42.6                              | KU175367                 | KU175433    | KU175500    |
| KH34      | 80.6                              | KU175368                 | KU175434    | KU175501    |
| KH39B     | 99.7                              | KU175369                 | KU175435    | KU175502    |
| KH40B     | 48.2                              | KU175370                 | KU175436    | KU175503    |
| KH41A     | 94.3                              | KU175371                 | KU175437    | KU175504    |
| KH43A     | 66.4                              | KU175372                 | KU175438    | KU175505    |
| KH48C     | 85.6                              | KU175373                 | KU175439    | KU175506    |
| KS1B      | 79.1                              | KU175374                 | KU175440    | KU175507    |
| KS3B      | 58.7                              | KU175375                 | KU175441    | KU175508    |
| KS8A      | 80.1                              | KU175376                 | KU175442    | KU175509    |
| KS11C     | 85.8                              | KU175377                 | KU175443    | KU175510    |
| KS14A     | 100.2                             | KU175378                 | KU175444    | KU175511    |
| KS30B     | 71.5                              | KU175379                 | KU175445    | KU175512    |
| KS32B     | 37.0                              | KU175380                 | KU175446    | KU175552    |
| KS33D     | 40.2                              | KU175381                 | KU175447    | KU175513    |
| KS35C     | 100.4                             | KU175382                 | KU175448    | KU175514    |
| KS42A     | 41.6                              | KU175383                 | KU175449    | KU175515    |
| KS43AB    | 54.5                              | KU175384                 | KU175450    | KU175516    |
| KS45A     | 101.0                             | KU175385                 | KU175451    | KU175517    |
| KS46A     | 101.1                             | KU175386                 | KU175452    | KU175518    |
| NH2B      | 82.0                              | KU175387                 | KU175453    | KU175553    |
| NH4       | 55.5                              | KU175388                 | KU175454    | KU175554    |
| NH7       | 100.3                             | KU175389                 | KU175455    | KU175519    |
| NH8B      | 100.4                             | NR_074657                | KU175456    | KU175555    |
| NH11      | 65.6                              | KU175390                 | KU175457    | KU175520    |
| NH15      | 100.9                             | KU175391                 | KU175458    | KU175521    |
| NH16      | 54.5                              | KU175392                 | KU175459    | KU175522    |
| NH19      | 71.7                              | KU175393                 | KU175460    | KU175556    |
| NH27B     | 100.1                             | KU175394                 | KU175461    | KU175523    |
| NH30A     | 90.8                              | KU175395                 | KU175462    | KU175557    |
| NH33B     | 83.9                              | KU175396                 | KU175463    | KU175558    |
| NH34      | 87.1                              | KU175397                 | KU175464    | KU175559    |
| NH38B     | 99.7                              | KU175398                 | KU175465    | KU175524    |
| NH48C     | 89.7                              | KU175399                 | KU175466    | KU175560    |
| NH49      | 67.8                              | KU175400                 | KU175467    | KU175561    |

Table S3. Continued

| Strain ID | Proportion of Fe(II) oxidized (%) | GenBank Accession Number |             |             |
|-----------|-----------------------------------|--------------------------|-------------|-------------|
|           |                                   | 16S rRNA gene            | <i>nirS</i> | <i>nosZ</i> |
| NS6       | 72.1                              | KU175401                 | KU175468    | KU175525    |
| NS11      | 65.9                              | KU175402                 | KU175469    | KU175526    |
| NS12B     | 55.0                              | KU175403                 | KU175470    | KU175527    |
| NS13E     | 53.3                              | KU175404                 | KU175471    | KU175528    |
| NS15      | 100.2                             | KU175405                 | KU175472    | KU175529    |
| NS20B     | 41.5                              | KU175406                 | KU175473    | KU175530    |
| NS21B     | 99.3                              | KU175407                 | KU175474    | KU175531    |
| NS22      | 100.8                             | KU175408                 | KU175475    | KU175532    |
| NS23      | 63.1                              | KU175409                 | KU175476    | KU175533    |
| NS24EB    | 52.6                              | KU175410                 | KU175477    | KU175534    |
| NS25      | 67.5                              | KU175411                 | KU175478    | KU175535    |
| NS27A     | 46.9                              | KU175412                 | KU175479    | KU175536    |
| NS28      | 62.9                              | KU175413                 | KU175480    | KU175537    |
| NS31A     | 81.4                              | KU175414                 | KU175481    | KU175538    |
| NS38B     | 99.5                              | KU175415                 | KU175482    | KU175539    |
| NS39      | 70.9                              | KU175416                 | KU175483    | KU175540    |
| NS41      | 51.2                              | KU175417                 | KU175484    | KU175541    |
| NS46      | 58.9                              | KU175418                 | KU175485    | KU175542    |
| YNH5A     | 88.2                              | KU175419                 | KU175486    | KU175543    |
| YNH10AA   | 92.2                              | KU175420                 | KU175487    | KU175544    |
| YNH19CA   | 100.9                             | KU175421                 | KU175488    | KU175545    |
| YNH28A    | 100.5                             | KU175422                 | KU175489    | KU175562    |
| YNH30A    | 85.3                              | KU175423                 | KU175490    | KU175563    |
| 2002      | 82.1                              | AY609199                 | KU175491    | KU175546    |
| LMG 24211 | 68.8                              | NR_044327                | KU175492    | KU175548    |
| JCM 17850 | 98.7                              | NR_118145                | KU175493    | KU175547    |

Table S4. Concentrations [mM] of  $\text{NO}_3^-$ ,  $\text{NO}_2^-$ , Fe(II), and Fe(III) in the anoxic basal medium 0 day and 7 days after inoculation of *Pseudogulbenkiania* sp. strain NH8B. The same data were used to draw Figure 1.

|       | $\text{NO}_3^-$ |       |       |       |      | $\text{NO}_2^-$ |      |      |      |      |
|-------|-----------------|-------|-------|-------|------|-----------------|------|------|------|------|
|       | A               | B     | C     | Mean  | SD   | A               | B    | C    | Mean | SD   |
| Day 1 | 4.47            | 4.54  | 4.47  | 4.50  | 0.04 | 0.08            | 0.09 | 0.09 | 0.09 | 0.00 |
| Day 7 | 2.68            | 2.60  | 2.54  | 2.60  | 0.07 | 0.89            | 0.76 | 0.90 | 0.85 | 0.07 |
| Delta | -1.80           | -1.94 | -1.94 | -1.89 | 0.08 | 0.81            | 0.67 | 0.81 | 0.76 | 0.08 |

|       | Fe(II) |       |       |       |      | Fe(III) |      |       |      |      |
|-------|--------|-------|-------|-------|------|---------|------|-------|------|------|
|       | A      | B     | C     | Mean  | SD   | A       | B    | C     | Mean | SD   |
| Day 1 | 9.29   | 8.55  | 8.86  | 8.90  | 0.37 | 0.69    | 0.97 | 0.95  | 0.87 | 0.16 |
| Day 7 | 0.13   | 0.13  | 0.12  | 0.12  | 0.00 | 9.73    | 9.93 | 10.05 | 9.90 | 0.16 |
| Delta | -9.17  | -8.42 | -8.74 | -8.78 | 0.37 | 9.04    | 8.96 | 9.10  | 9.03 | 0.07 |

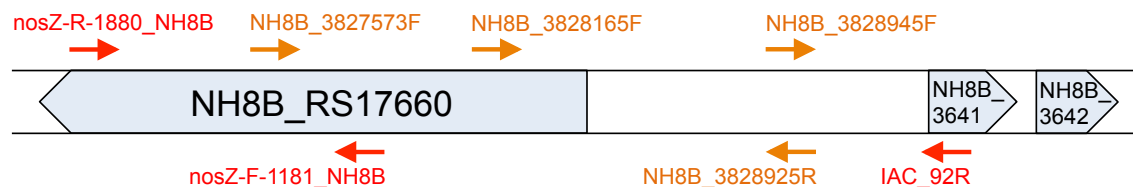

Figure S1. Annealing sites of the primers used to amplify and sequence *nosZ* and the intergenic region between *nosZ* (NH8B\_RS17660) and *nosZ*-like pseudogene (NH8B\_3641 and NH8B\_3642). Red and brown arrows indicate the annealing sites of the primers for PCR and sequencing reactions, respectively. Primer sequences are shown in Table S1.

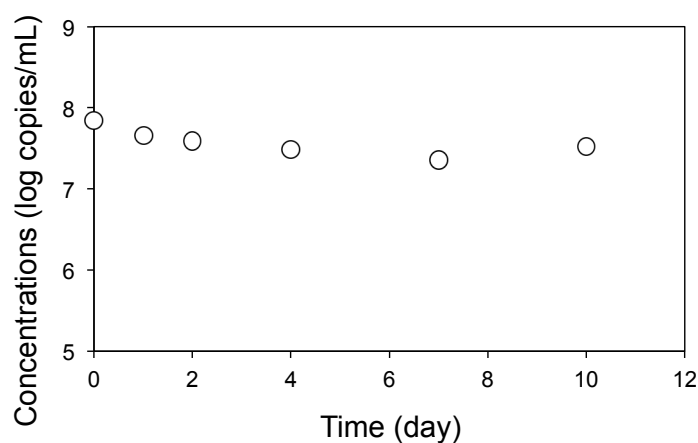

Figure S2. Concentration of cells in the culture medium, as measured by strain-specific quantitative PCR. Cells were collected from the medium in the NDFO conditions (Fig. 1). Target molecule is present in one copy/genome; therefore, copies/mL is equivalent to cells/mL.

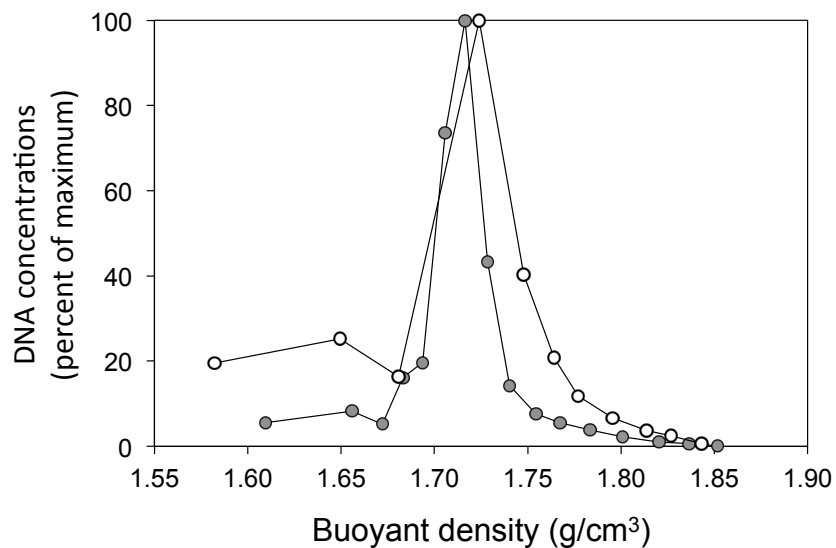

Figure S3. Cesium chloride density gradient centrifugation of DNA extracted from cells. Legends: ●, cells incubated in the medium containing  $^{13}\text{C}$ -labeled bicarbonate, 5 mM nitrate, and 10 mM  $\text{FeCl}_2$ ; ○, cells incubated in the medium containing  $^{13}\text{C}$ -labeled bicarbonate, 5 mM nitrate, and 10 mM  $\text{FeCl}_2$ .

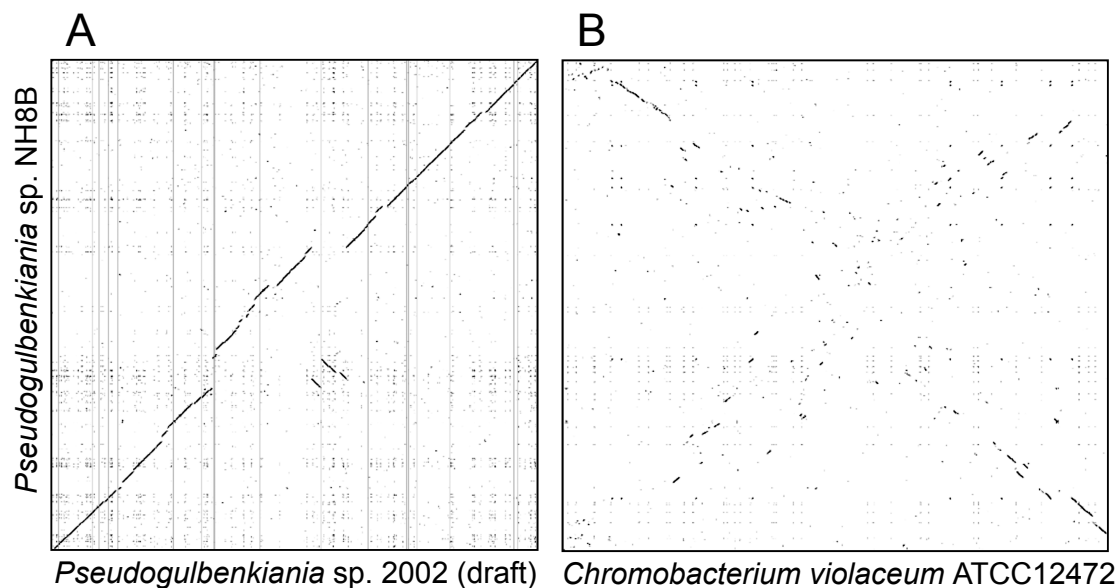

Figure S4. Dot-plot analysis (A) between *Pseudogulbenkiania* sp. strains NH8B and 2002 and (B) between strain NH8B and *Chromobacterium violaceum* ATCC 12472.

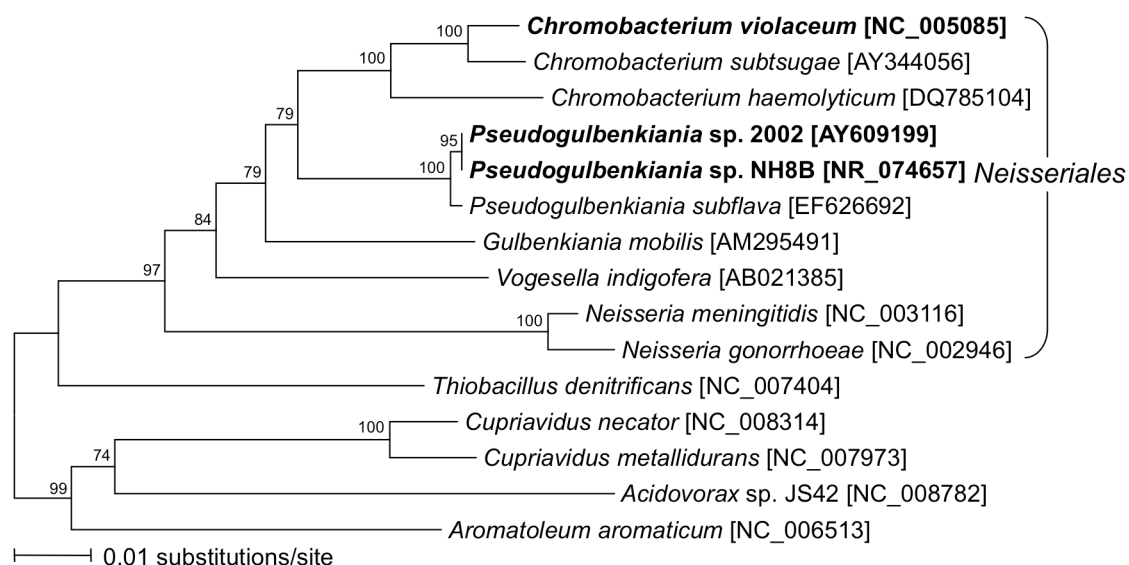

Figure S5. Phylogenetic relationships between strains *Pseudogulbenkiania* sp. strain NH8B, *Pseudogulbenkiania* sp. strain 2002, and some members of the family *Neisseriales* based on the full length 16S rRNA gene sequences. Phylogenetic tree was constructed using maximum likelihood method. The bootstrap values (>70%) from 1,000 replicates are indicated next to the branches. The accession numbers of the reference strains in the DDBJ/EMBL/GenBank databases are indicated in brackets.

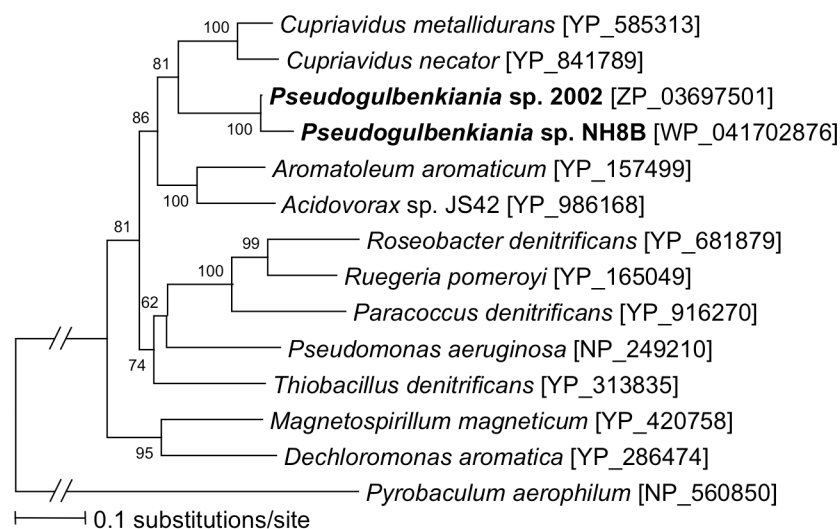

Figure S6. Phylogenetic relationships of the deduced NirS amino acid sequences between strains *Pseudogulbenkiania* sp. strain NH8B and *Pseudogulbenkiania* sp. strain 2002. Phylogenetic tree was constructed using maximum likelihood method. The bootstrap values (>70%) from 1,000 replicates are indicated next to the branches. The accession numbers of the reference strains in the DDBJ/EMBL/GenBank databases are indicated in

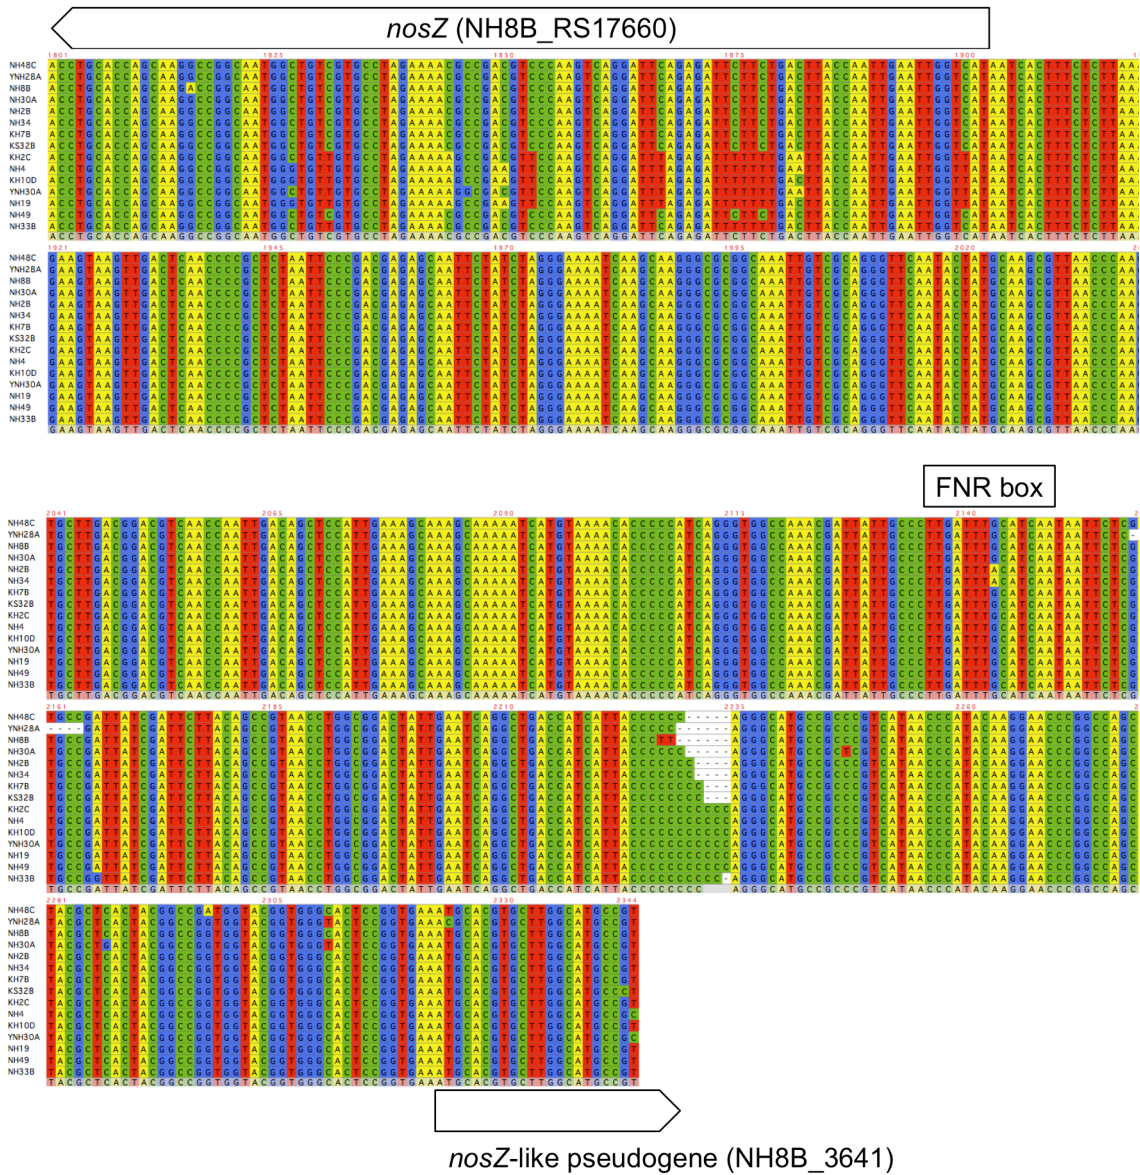

brackets.

Figure S7. Nucleotide sequence alignment of the intergenic region between *nosZ* and *nosZ*-like pseudogene from 15 NH8B-type *Pseudogulbenkiania* sp. strains. Region of the FNR-binding motif (FNR box; TTGAT----ATCAA) is also shown.

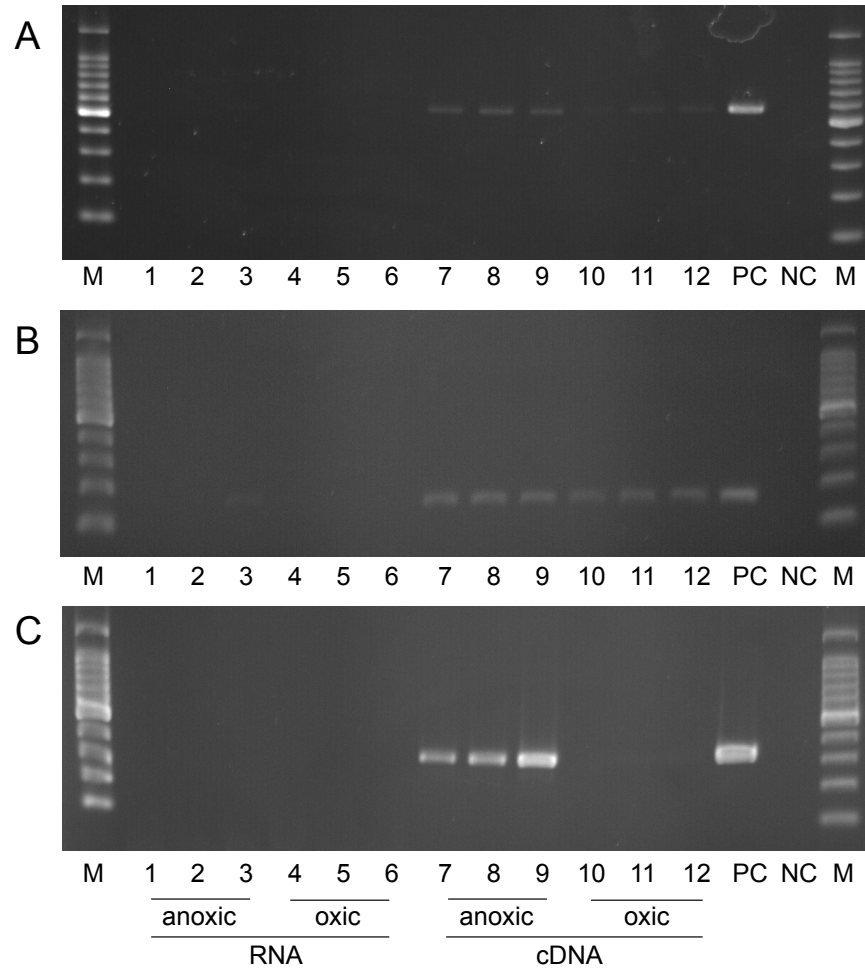

Figure S8. Gel images of the amplicons obtained by reverse transcription PCR done with (A) strain NH8B and NH8B\_3826510F and NH8B\_3827082R primers, (B) strain NH8B and NH8B\_3828317F and NH8B\_3829464R primers, and (C) strain 2002 and 2002\_323853F and 2002\_324186R primers. Legends: 1–3, RNA extracted from cells incubated under anoxic conditions; 4–6, RNA extracted from cells incubated under oxic conditions; 7–9, cDNA synthesized from RNA 1–3, respectively; 10–12, cDNA synthesized from RNA 4–6, respectively; genomic DNA used as a positive control; NC, negative control (nuclease-free water); M, 100-bp DNA ladder.
